# Supplementary material for: A Survey of Innovation through Duplication in the Reduced Genomes of Twelve Parasites
Source: PLOS journal article supplement (doi:10.1371/journal.pone.0099213), 2014-06-11

# Supplemental Figure 2

## *P. falciparum* segmental duplication markers

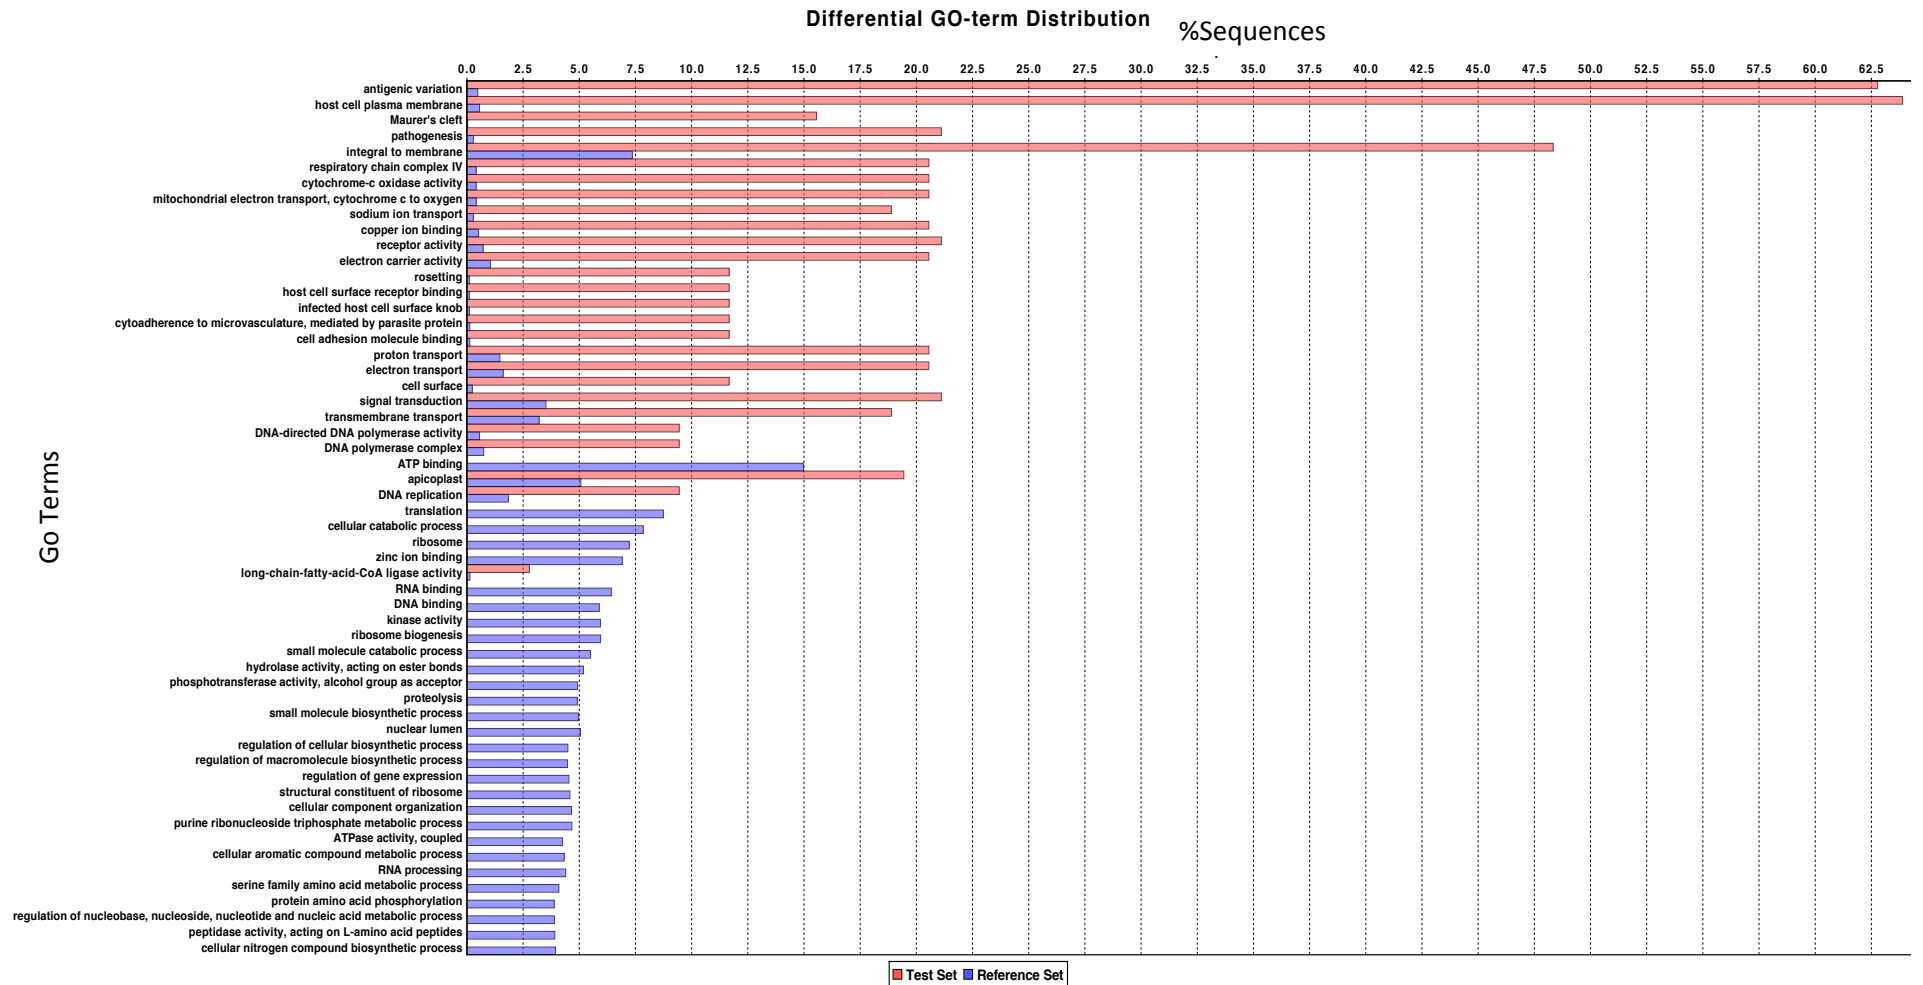

## Most specific Molecular Function GO terms for *P. falciparum*, N=191

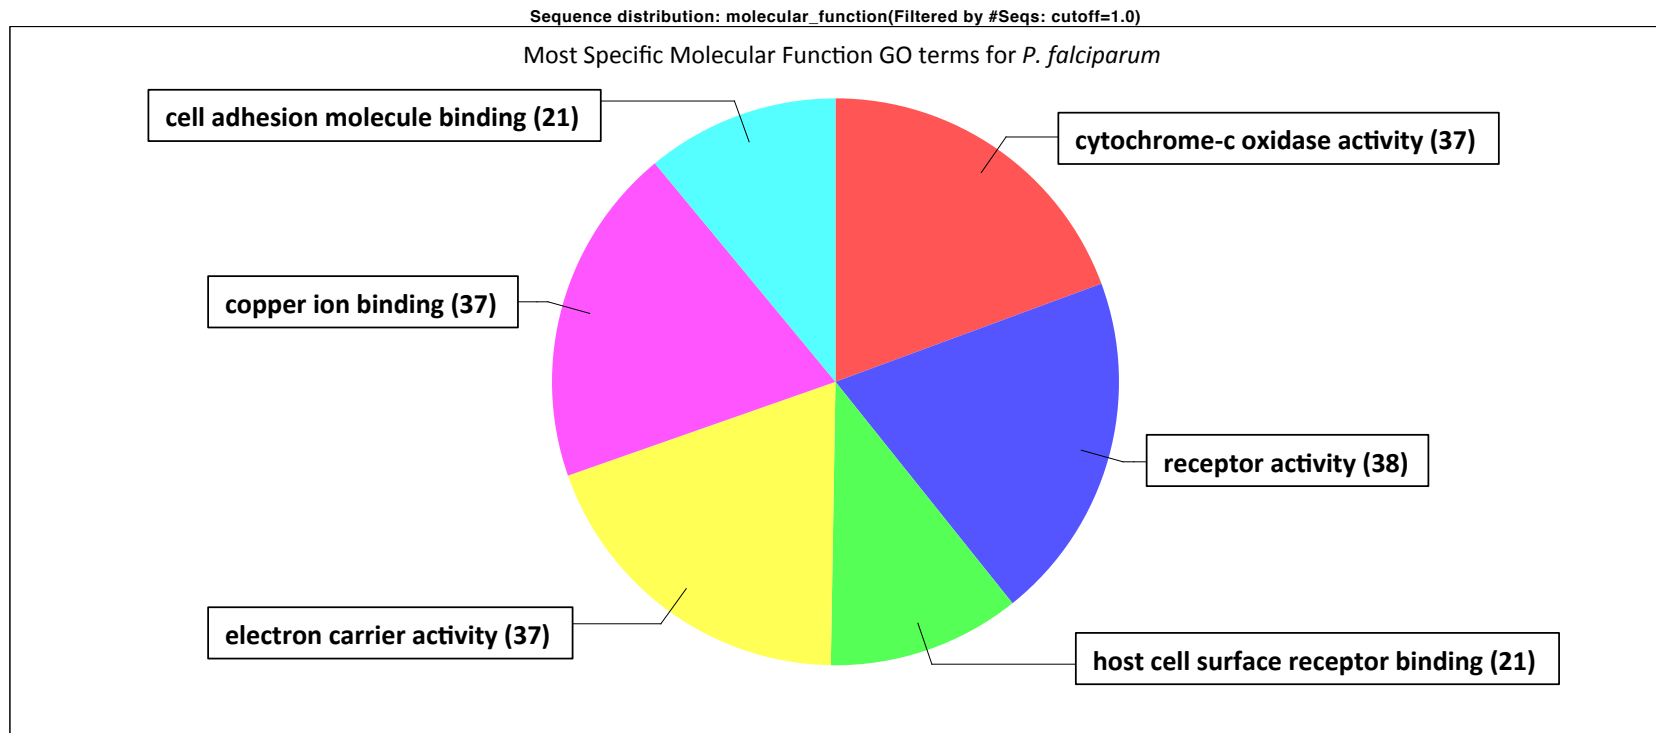

Supplement: S2 (10.1371/journal.pone.0099213.s002) [file journal.pone.0099213.s002]
